# Supplementary material
Source: HighWire-hosted journal article supplement (http://cmajopen.ca/highwire/filestream/80963/field_highwire_adjunct_files/0/open-2015-0104-original-submission.pdf)

1  
2  
3  
4  
5  
6  
7  
8  
9  
10  
11  
12  
13  
14  
15  
16  
17  
18  
19  
20  
21  
22  
23  
24  
25  
26  
27  
28  
29  
30  
31  
32  
33  
34  
35  
36  
37  
38  
39  
40  
41  
42  
43  
44  
45  
46  
47  
48  
49  
50  
51  
52  
53  
54  
55  
56  
57  
58  
59  
60

**Impact of Canadian Tobacco Packaging on Quitline Utilization:  
An Interrupted Time Series Analysis of Call Volume and New Callers**

N. Bruce Baskerville, PhD<sup>1,2</sup>

K. Stephen Brown, PhD<sup>4</sup>

Nghia C. Nguyen, PhD<sup>1</sup>

Lynda Hayward, PhD<sup>1</sup>

Ryan David Kennedy, PhD<sup>1,3</sup>

David Hammond, PhD<sup>2</sup>

H. Sharon Campbell, PhD<sup>1,2</sup>

<sup>1</sup> Propel Centre for Population Health Impact, University of Waterloo

<sup>2</sup> School of Public Health and Health Systems, University of Waterloo

<sup>3</sup> Institute for Global Tobacco Control, Department of Health, Behavior & Society, Johns Hopkins  
Bloomberg School of Public Health

<sup>4</sup> Statistics and Actuarial Sciences, University of Waterloo

Key Words: Tobacco use, Tobacco control, Tobacco Packaging, Health Warning Labels, Quitline  
Utilization

Abstract Word Count: 245

Manuscript Word Count: 2,886

Address correspondence to:

Neill Bruce Baskerville, MHA, PhD

Propel Centre for Population Health Impact

University of Waterloo

Waterloo, Ontario, N2L 3G1

Canada

Phone: 519 888 4567 ext. 35236

Email: nbbaskerville@waterloo.ca

## Abstract

**Introduction:** A new set of pictorial health warning labels were introduced by Health Canada in 2012 and included, for the first time, a quitline toll-free number as part of Canadian tobacco packaging warning label policy. This study uses data from the Ontario provincial quitline to investigate whether there were changes in call volumes and new callers receiving treatment in the months before compared to months after the new policy.

**Methods:** An interrupted time-series analysis examined trends in Ontario quitline monthly call volume and number of new callers receiving treatment between January 2010 and December 2013 after adjusting for the January effect, cigarette prices and a major promotional campaign. Data were analyzed using Box-Jenkins autoregressive integrated moving average models.

**Results:** There was a 160% increase in average monthly call volume for the seven months after the introduction of the new warning label policy (baseline 870/ month; after policy 1391 additional calls/ month [S.E. 108.94,  $p < .0001$ ]) and a sustained increase of 43% in subsequent months. For new callers, there was a relative increase of 174% (baseline 153/ month; after policy 267 additional callers/ month [S.E. 40.03,  $p < .0001$ ]) and a sustained increase of 80%.

**Interpretation:** There has been a sustained increase in both overall calls and new callers to the quitline after the introduction of the health warning labels. This increase is not attributable to other promotion campaigns or seasonality effects. The new policy was associated with a significant increase in quitline call volumes.

# Impact of Canadian Tobacco Packaging on Quitline Utilization: An Interrupted Time Series Analysis of Call Volume and New Callers

## Introduction

Tobacco is a leading cause of preventable illness and death in Canada and throughout the world.(1,2) In Canada, it is estimated that approximately 100 Canadians die each day from a smoking-related illness.(3) The economic impact of tobacco related illness in Canada is also significant, with the annual burden of tobacco smoking estimated to be \$21.3 billion.(4) In Ontario—Canada’s largest province— smoking is the biggest factor for hospital bed-utilization, accounting for 22% of men’s and 12% of women’s hospital bed-days and almost \$1 billion in hospital costs for 2011.(5) In 2013, smoking prevalence in Ontario was 12.6%, below the national average of 14.6% for Canadians aged 15+. (6)

Canada introduced pictorial health warning labels on cigarette packs in the year 2000. A new set of pictorial health warning labels (HWLs) were introduced by Health Canada in 2012 (see Figure 1) and included, for the first time, a quitline toll-free number.(7) Manufacturers were prohibited from producing cigarette packages and retailers were prohibited from selling cigarettes without the new HWLs as of March 21 and June 18, 2012 respectively. Including a quitline telephone number in tobacco warnings on cigarette packages has been found to increase call volume(8,9) and number of registrants.(10,11) For example, following the introduction of graphic warning labels with a quitline number in Australia, there was a 84% increase in the number of calls to the Quitline.(12)

Quitlines are an effective population health intervention that can be used by smokers who are motivated and seek support to quit using tobacco.(13) They can be easily accessed free of charge, have no eligibility restrictions, and provide evidence-based information, advice and motivational counselling to callers. Therefore, the volume of calls to a quitline has frequently been used as an indicator of

1  
2  
3 interest in quitting in response to population-based cessation policies such as HWLs with a toll-free  
4  
5 quitline number.(9,12,14)  
6  
7

8  
9 This study uses data from the Ontario provincial quitline, Smokers' Helpline (SHL), to investigate  
10  
11 whether there were changes in SHL call volumes, the number of new callers receiving treatment and the  
12  
13 characteristics of new callers in the months leading up to, and after, the introduction of the new HWLs  
14  
15 with a toll-free quitline number as part of Canadian tobacco packaging warning label policy.  
16  
17

18 Implementation of the new HWLs and pan-Canadian quitline number on tobacco packaging is an ideal  
19  
20 example of a natural experiment – i.e. a rapidly unfolding policy that is not under the control of the  
21  
22 investigation team.  
23  
24

## 25 26 **Methods**

27  
28 We used an interrupted time-series analysis (15,16) to identify patterns over time, in the sequence of  
29  
30 SHL overall monthly call volume and number of new callers receiving treatment. An interrupted time-  
31  
32 series design, adjusting for secular trends, is an ideal design for assessing the effects of a population-  
33  
34 wide intervention such as a toll-free quitline number on tobacco packaging.(15,16) Since the new HWLs  
35  
36 were phased in from 21 March 2012, we considered March, 2012 the start of the intervention and  
37  
38 looked at SHL call volume and number of new callers before and after this date, while adjusting for  
39  
40 other SHL promotion campaigns, the January effect, and Ontario tobacco pricing. The Strengthening the  
41  
42 Reporting of Observational Studies in Epidemiology (STROBE) guideline statement was used to assist in  
43  
44 the reporting of this study. (17) The study was reviewed by the University of Waterloo, Office of  
45  
46 Research Ethics.  
47  
48  
49  
50

## 51 52 *Measures*

53 Overall switchboard call volume and number of new incoming callers were the two variables used to  
54  
55 determine the impact of HWLs on SHL utilization. Switchboard call volume (including both calls handled  
56  
57  
58  
59  
60

1  
2  
3 and calls abandoned) and new caller data were collected for 48 months between January 2010 and  
4  
5 December 2013 from the SHL telephone switchboard and intake database, respectively. New incoming  
6  
7 callers are defined as callers who initiated contact by calling the quitline, were age 18 and over, smoked  
8  
9 daily or occasionally at intake or had recently quit (within the past 30 days), received treatment from  
10  
11 SHL (at least one counselling session), and had no contact with SHL in the 12 months prior to calling(18).  
12  
13 Tracking the number of new callers receiving treatment from SHL over time allows for a better  
14  
15 determination of the impact of the new HWLs on encouraging callers to use the promoted quitline. Age,  
16  
17 gender, education, ethnicity, smoking status (daily or occasional), cigarette consumption, quit  
18  
19 intentions, and the heaviness of smoking index (HSI) were collected at intake from new incoming callers.  
20  
21 (19,20)  
22  
23  
24  
25  
26  
27

28 Other variables that could increase the volume of calls to SHL included the promotional campaign  
29  
30 Driven-to-Quit (D2Q), the January effect, and tobacco pricing. D2Q is a media campaign run in February  
31  
32 that promotes SHL through a contest that offers smokers a chance to win prizes if they quit. The D2Q  
33  
34 campaign was run in February 2010, 2011 and 2012, but not in February 2013. The January effect is a  
35  
36 seasonal phenomenon where people decide to make lifestyle changes such as stopping smoking as a  
37  
38 New Year's resolution resulting in increased calls to SHL.(21,22). The January effects in 2010, 2011 and  
39  
40 2012 affect the pre-HWL period, while the January 2013 effect occurs in the post-HWL period. Finally,  
41  
42 Ontario tobacco prices (\$ for 200 cigarette pack) were included to adjust for the effect of price on desire  
43  
44 to quit smoking.(23) Ontario tobacco prices adjusted for inflation (2002=100) for each month were  
45  
46 provided by Statistics Canada.(24)  
47  
48  
49  
50

### 51 *Analysis*

52  
53 Caller characteristics during the pre- and post-label periods were summarized using the mean  $\pm$  SD for  
54  
55 continuous variables and compared using the *t*-test for independent groups. For categorical variables,  
56  
57 the pre- and post-label periods were summarized with frequency percentages and compared with a  $\chi^2$   
58  
59  
60

1  
2  
3 test. SHL monthly call volume and new caller data were plotted on a graph over 48 months. Means,  
4  
5 95% confidence intervals and percent change of monthly call volume and number of new callers before  
6  
7 and after the HWL introduction, with and without the D2Q campaign, and in January or not were  
8  
9 calculated for descriptive purposes.  
10  
11

12  
13 To identify whether changes in SHL overall monthly call volume and number of new callers overtime  
14  
15 were related to the new HWLs, the model used for analysis was Box-Jenkins auto-regressive integrated  
16  
17 moving average (ARIMA( $p, d, q$ )) model.(25) ARIMA was preferable to traditional regression techniques  
18  
19 as it took into account whether subsequent values were correlated; such autocorrelation violates the  
20  
21 assumption of independence central to linear regression. There were three years with D2Q in the pre-  
22  
23 intervention period and none in the post-intervention period. Similarly, the January effect was present  
24  
25 in three of the twenty-six pre-intervention months but only one of the twenty-two post intervention  
26  
27 months. Therefore, it is important to adjust for the effect of the D2Q campaign and the January effect  
28  
29 when comparing pre- and post-intervention outcomes.  
30  
31  
32  
33  
34

35 We investigated a number of possible models using autocorrelation and partial autocorrelation  
36  
37 functions and checked the stationarity properties of the residuals from models for both the overall call  
38  
39 volume and new caller time series to identify statistically adequate and parsimonious models. The  
40  
41 adequacy of candidate models was assessed by examining the autocorrelation function (ACF) and partial  
42  
43 autocorrelation function (PACF) plots of residuals, Ljung-Box chi-square tests for normally distributed  
44  
45 white noise residuals, and Q-Q plots of residuals. The Akaike Information Criterion (AIC) was used to  
46  
47 compare two nested candidate models, when needed. ARIMA (1,0,0) models provided adequate fits for  
48  
49 both the overall call volume and new caller time-series data subsets.. We compared the fit from the  
50  
51 predicted model and the observed series using the adjusted  $R^2$  measure and the Root Mean Square  
52  
53  
54  
55  
56  
57  
58  
59  
60

1  
2  
3 Error for ease of interpretation. We describe the HWL intervention in terms of time to peak, duration  
4  
5 of the initial effect and the sustainability of the effect in months for both call volume and new callers.  
6  
7

8  
9 To obtain an understanding of impact of the introduction of the new HWLs over the long-term, two  
10  
11 ARIMA models, one for overall call volume and one for number of new callers, were investigated  
12  
13 covering the period of 48 months (26 months before intervention, and 22 months after intervention).  
14  
15 The two models included binary dummy variables to model the effect of the introduction of the new  
16  
17 HWLs (coded as 1 for March 2012 to December 2013, and 0 otherwise), the sustainability of the effect  
18  
19 (coded as 1 for October 2012 to December 2013, and 0 otherwise), the seasonal January effect to  
20  
21 account for the increase in number of calls in the New Year, and the D2Q campaign in February 2010,  
22  
23 2011 and 2012, as well as Ontario tobacco prices as a continuous variable. We coded for the  
24  
25 sustainability effect to account for the decline in the call volume and new callers after September 2012  
26  
27 as found in other quitline studies.(8,12) The effects of the potential confounders of the January effect  
28  
29 and D2Q were significant and so were retained in the final model but tobacco pricing was discarded as it  
30  
31 was not statistically significant. Analyses for this project were conducted using SPSS version 22.0 (IBM  
32  
33 Corp. Released 2013. IBM SPSS Statistics for Windows, Version 22.0. Armonk, NY: IBM Corp).  
34  
35  
36  
37  
38  
39

## 40 **Results**

41 The characteristics of new SHL callers receiving treatment changed after the introduction of the new  
42  
43 HWL. For example, the proportion of callers who were male and those with high school education or  
44  
45 less each increased significantly. Post HWL with the quitline toll-free number, the average age of callers  
46  
47 was significantly younger and there was a significant increase in the proportion of callers that were daily  
48  
49 smokers compared to non-daily and who intended to quit in the next 30 days. In addition, the  
50  
51 proportion of callers with a reported ethnicity other than 'white' increased significantly (see Table 1).  
52  
53  
54  
55  
56  
57  
58  
59  
60

1  
2  
3 Figure 2 illustrates changes over time in the overall call volume and number of new callers receiving  
4 treatment from January 2010 to December 2013. Overall call volume and new callers was noticeably  
5 higher for the seven months from March 2012 to September 2012, and peaked in the fourth (June 2012)  
6 and third month (May 2012) respectively, after the introduction of the HWLs before stabilizing at higher  
7 values than pre-policy. Table 2 describes the mean changes in overall call volume and the number of  
8 new callers before and after the introduction of the new HWLs, as well as a result of the D2Q campaign  
9 and the seasonal January effect. After the introduction of the new HWLs, overall call volume increased  
10 by 52.5% to a mean of 1,591 (95% CI 1,355-1,827) calls per month compared to a mean of 1043 (95% CI  
11 868-1218) prior to March 2012 (see Table 2). Similarly, the number of new callers receiving treatment  
12 increased 80.5% from a monthly average of 185 (95% CI 146-224) before the HWL policy to an average  
13 of 334 (95% CI 288-380) after the policy. It is important to note that the differences between the pre-  
14 and post-HWL periods are affected by the imbalance in the number of months with the D2Q  
15 intervention, and the relative number of months of the January effect, as described above.  
16  
17  
18  
19  
20  
21  
22  
23  
24  
25  
26  
27  
28  
29  
30  
31  
32  
33  
34  
35

36 Table 3 provides the ARIMA model estimates and Figure 2 includes the fitted model values for overall  
37 call volume and number of new callers while adjusting for the confounders of the January effect and the  
38 D2Q promotion campaign. For the overall call volume data, the auto-regressive parameter was not  
39 significant. However, we retained it in the model for comparability with the model for the number of  
40 new callers. Based on the model for overall call volume, the SHL baseline level, defined as the average  
41 monthly overall call volume, adjusting for the January effect and the D2Q promotion campaign, was 870  
42 calls per month before introduction of the new HWLs; these numbers significantly increased by an  
43 average of 1391 additional calls (to 2261 calls per month on average) per month from March 2012 to  
44 September 2012 – a 160% relative increase. In subsequent months (October 2012 to December 2013),  
45  
46  
47  
48  
49  
50  
51  
52  
53  
54  
55  
56  
57  
58  
59  
60



1  
2  
3 there were 1019 fewer calls on average than during the first seven months; however, the average  
4  
5 number of calls was still 43% higher than in the baseline period.  
6  
7

8  
9  
10 For number of new callers, the auto-regressive parameter was significant. The baseline level was 153  
11  
12 new callers per month before introduction of the new HWLs; these numbers significantly increased by  
13  
14 an average of 267 additional calls per month – a relative increase of 174% - during the period March  
15  
16 2012-September 2012. This effect was sustained in subsequent months. While there was an average of  
17  
18 145 fewer new calls per month relative to the first seven months of the intervention, an estimated 80%  
19  
20 of new calls per month were retained. Both D2Q and the January effect were significantly associated  
21  
22 with call volumes and number of new callers. The analysis shows that the association of the HWL policy  
23  
24 intervention on both overall call volume and number of new callers was stable and long term while  
25  
26 adjusting for the confounders of January effect and the D2Q campaign.  
27  
28  
29  
30

### 31 32 **Interpretation**

33 This paper was a natural experiment that investigated the impact of the implementation of the new toll-  
34  
35 free quitline number as part of Canadian tobacco packaging warning label policy on changes in SHL call  
36  
37 volumes and number of new callers receiving treatment. We found a significant increase in both overall  
38  
39 call volume and number of new callers coinciding with the introduction of the new HWLs while  
40  
41 controlling for other promotion campaigns and the January effect. Call volumes and new callers after  
42  
43 the introduction of the new HWLs peaked in four months and three months respectively and the effect  
44  
45 lasted for 7 months after the introduction of the new HWLs and was sustained for an additional 15  
46  
47 months. These findings will support other countries that are considering the introduction of HWLs with  
48  
49 a toll-free quitline number.  
50  
51  
52  
53  
54  
55  
56  
57  
58  
59  
60

1  
2  
3 This study adds to the evidence of the benefit of inclusion of a toll-free quitline number on tobacco  
4 packages. (8,9,11,12,26,27) We found a 43% and 80% sustained increase in call volumes and number of  
5  
6 new callers attributable to the HWLs with a toll-free quitline number which is similar to the experience  
7  
8 from other countries that show calls increase substantially with the introduction of numbers on tobacco  
9  
10 packaging. (8,12) For example, when Australia introduced new plain packaging and health warnings  
11  
12 with the quitline number prominently displayed, the number of calls to their quitline increased 78%.(12)  
13  
14 Whereas the study by Bot and colleagues demonstrated a mean relative increase of 100% one year after  
15  
16 the introduction of HWLs across seven European countries. (8) Similar to Young et al.(12), this study  
17  
18 found the January effect to be significant and did not find cigarette prices to be a significant factor  
19  
20 related to quitline utilization. However, the province of Ontario has had no increases in tobacco taxes  
21  
22 during the period under study with the rise in tobacco price at July 1, 2010 due to the implementation of  
23  
24 the 8% provincial portion of Harmonized Sales Tax (HST). Further, Canada's new HWL policy has  
25  
26 demonstrated increased population level awareness of the quitline toll-free number as well as use of  
27  
28 quitline services in terms of both overall population level reach and the reach equity into sub-  
29  
30 populations of smokers that bear an undue burden from tobacco. (28) The HWL policy has reduced  
31  
32 inequity with the characteristics of callers to the quitline having changed significantly in terms of being  
33  
34 younger, male, lower educational status and non-white.  
35  
36  
37  
38  
39  
40  
41  
42  
43  
44

45 Strengths of the study include accounting for other known influences on use of a quitline, such as  
46  
47 promotion campaigns. In addition, this study has introduced the indicator number of new callers which  
48  
49 other studies to-date have not used. We believe that this indicator better reflects the impact of a new  
50  
51 policy implementation such as HWLs with a toll-free quitline number as one would expect to see calls  
52  
53 from new smokers not familiar with quitline services to increase. Call volumes and number of new  
54  
55 callers are direct behavioural indicators of quitting intentions and are not subject to the social  
56  
57  
58  
59  
60

1  
2  
3 desirability and measurement biases that may occur in self-report surveys. Further, quitline data allow  
4  
5 the ability to assess the impact of the new HWL policy in real-time and are ideal for interrupted time-  
6  
7 series analysis as a robust method for the evaluation of a policy that affects the whole population and  
8  
9 where randomization or a control group is impossible.(29) Limitations are those typical of studies that  
10  
11 use administrative data.(30) The quitline data were cleaned, coded and checked for consistency to  
12  
13 ensure quality; however, some errors in reporting may exist. Despite these limitations, the data  
14  
15 represent all caller activity for the province of Ontario over a four year period and thus we believe our  
16  
17 findings are significantly robust to provide an understanding of the association between the new HWLs  
18  
19 and increased use of the quitline in Ontario. Although the time-series study design cannot prove  
20  
21 causation, we have shown a positive and sustained association between a policy intervention and  
22  
23  
24  
25  
26  
27  
28  
29  
30  
31  
32  
33  
34  
35  
36  
37  
38  
39  
40  
41  
42  
43  
44  
45  
46  
47  
48  
49  
50  
51  
52  
53  
54  
55  
56  
57  
58  
59  
60

smoker response.

In conclusion, the combination of a quitline toll-free number and the new labels on tobacco packaging was associated with a significant increase in call volumes and the number of new callers to SHL Ontario as well as significant changes in the characteristics of callers. It is an effective policy for increasing and maintaining quitline call volumes. Future research should investigate the impact of the policy on other provinces given the differences that exist across Canada with regard to promotion and tobacco taxation. Finally, future research needs to consider the impact of the policy on smoking cessation outcomes and the overall prevalence of smoking.

**Competing interests**

None declared.

**Funding**

This work was supported by a partnership of the CIHR Institute of Population and Public Health and the Public Health Agency of Canada, Chronic Diseases Intervention Division (grant # 112868), and the Canadian Cancer Society Research Initiative (grant #701019). DH is supported by a Chair in Applied Public Health, funded by the Public Health Agency of Canada (PHAC) in partnership with Canadian Institutes of Health Research (CIHR) Institute of Neurosciences, Mental Health and Addiction (INMHA) and Institute of Population and Public Health (IPPH).

**Acknowledgements**

We thank Barbara Zupko from the Propel Centre for Population Health Impact and John Atkinson, Gail Luciano and Sharon Lee from the Ontario Smokers' Helpline for assistance in conducting the research and helpful comments. We also would like to thank the Editor of this journal and the anonymous referees for their helpful comments and suggestions.

**Authors' Contributions**

HSC and NBB led the conceptualization and design of the study and LH, NCN, DH, RDK and KSB contributed to the design of the study. NBB drafted the manuscript. NBB, NCN, LH, DH, RDK, KSB and HSC critically revised the manuscript for important intellectual content. NBB and HSC are co-principal investigators and DH, RDK and KSB are co-investigators on the research funding application. NCN and LH provided administrative, technical, and material support. NBB supervised the study. NBB is the guarantor.

## References

- (1) World Health Organization. Global Health Risks: Mortality and burden of disease attributable to selected major risks. 2009.
- (2) World Health Organization. WHO Global Report: Mortality Attributable to Tobacco. 2012.
- (3) Health Canada. Smoking and mortality. 2011; Available at: <http://www.hc-sc.gc.ca/hc-ps/tobac-tabac/legislation/label-etiquette/mortal-eng.php>. Accessed 12/11, 2014.
- (4) Krueger H., Turner D., Krueger J., et al. The economic benefits of risk factor reduction in Canada: tobacco smoking, excess weight and physical inactivity. *Can J Public Health* 2014;105(1):e69-78.
- (5) Manuel DG, Perez R, Bennett Cea. 900,000 Days in Hospital: The Annual Impact of Smoking, Alcohol, Diet and Physical Activity on Hospital Use in Ontario. Toronto, ON: Institute for Clinical Evaluative Sciences; 2014.
- (6) Reid JL, Hammond D, Rynard VL, Burkhalter R. Tobacco Use in Canada: Patterns and Trends, 2015 Edition. Waterloo, ON: Propel Centre for Population Health Impact, University of Waterloo; 2015.
- (7) Government of Canada. Tobacco Products Labelling Regulations (Cigarettes and Little Cigars). 2014; Available at: <http://laws-lois.justice.gc.ca/eng/regulations/SOR-2011-177/index.html>. Accessed 12/12, 2014.
- (8) Bot M, van der Meer R, and Willemsen M. Impact of Telephone Numbers on Cigarette Packets on Call Volumes to Quitlines . 2007:2014.
- (9) Miller CL, Hill DJ, Quester PG, Hiller JE. Impact on the Australian Quitline of new graphic cigarette pack warnings including the Quitline number. *Tob Control* 2009;18:235-237.
- (10) Li J, Grigg M. New Zealand: new graphic warnings encourage registrations with the quitline. *Tob Control* 2009;18(1):72.
- (11) Willemsen MC, Simons C, Zeeman G. Impact of the new EU health warnings on the Dutch quit line. *Tobacco Control* 2002 Dec;11(4):381-382.
- (12) Young JM, Stacey I, Dobbins TA, Dunlop S, Dessaix AL, Currow DC. Association between tobacco plain packaging and Quitline calls: A population-based, interrupted time-series analysis. *Med J Aust* 2014;200(1):29-32.
- (13) Stead LF, Hartmann-Boyce J, Perera R, Lancaster T. Telephone counselling for smoking cessation (Review). *Cochrane Database of Systematic Reviews* 2013;8(CD002850).
- (14) Farrelly MC, Davis KC, Nonnemaker JM, Kamyab K, Jackson C. Promoting calls to a quitline: Quantifying the influence of message theme, strong negative emotions and graphic images in television advertisements. *Tob Control* 2011;20(4):279-284.

- 1  
2  
3 (15) Victora CG, Habicht J-, Bryce J. Evidence-Based Public Health: Moving Beyond Randomized Trials.  
4 Am J Public Health 2004;94(3):400-405.  
5  
6  
7 (16) Petticrew M, Cummins S, Ferrell C, Findlay A, Higgins C, Hoy C, et al. Natural experiments: An  
8 underused tool for public health? Public Health 2005;119(9):751-757.  
9  
10 (17) Von Elm E, Altman DG, Egger M, Pocock SJ, Gøtzsche PC, Vandenbroucke JP. The Strengthening the  
11 Reporting of Observational Studies in Epidemiology (STROBE) statement: Guidelines for reporting  
12 observational studies. Epidemiology 2007;18(6):800-804.  
13  
14  
15 (18) North American Quitline Consortium. Measuring Reach of Quitline Programs. 2009.  
16  
17 (19) Heatherton TF, Kozlowski LT, Frecker RC, Rickert W, Robinson J. Measuring the heaviness of  
18 smoking: Using self-reported time to the first cigarette of the day and number of cigarettes smoked per  
19 day. British Journal of Addiction 1989;84(7):791-800.  
20  
21  
22 (20) Campbell HS, Ossip-Klein D, Bailey L, Saul J, Res Evaluation Working Grp, N Amer Quitline  
23 Consortium. Minimal dataset for quitlines: a best practice. Tob Control 2007 DEC;16:116-120.  
24  
25  
26 (21) Chandra S, Chaloupka FJ. Seasonality in cigarette sales: patterns and implications for tobacco  
27 control. Tob Control 2003;12:105-107.  
28  
29 (22) Chandra S, Gitchell JG, Shiffman S. Seasonality in Sales of Nicotine Replacement Therapies: Patterns  
30 and Implications for Tobacco Control. Nicotine Tob Res 2011;13:395-398.  
31  
32 (23) Bader P, Boisclair D, Ferrence R. Effects of Tobacco Taxation and Pricing on Smoking Behavior in  
33 High Risk Populations: A Knowledge Synthesis . Int. J. Environ. Res. Public Health 2011;8:4118-4129.  
34  
35  
36 (24) Statistics Canada. Table 326-0020 - Consumer Price Index, monthly (2002=100 unless otherwise  
37 noted), CANSIM (database). 2014; Available at:  
38 <http://www5.statcan.gc.ca/cansim/a26?lang=eng&id=3260020>. Accessed 05/15, 2014.  
39  
40  
41 (25) Brockwell PJ, Davis RA. Introduction to Time Series and Forecasting. 2nd ed. New York: Springer-  
42 Verlag; 2002.  
43  
44 (26) Li J, Grigg M, Weerasekera D, Yeh L-. Characteristics and quitting success of roll-your-own versus  
45 tailor-made cigarette smokers. N Z Med J 2010;123(1308):64-73.  
46  
47  
48 (27) Tilson M. "National Toll-free Helpline Number on Tobacco Package Labelling: The Impact on  
49 Quitlines" prepared for Canadian Network of Smokers' Helplines. 2007.  
50  
51 (28) Baskerville NB, Hayward L, Brown KS, Hammond D, Kennedy RD, Campbell HS. Impact of Canadian  
52 Tobacco Packaging Policy on Quitline Reach and Reach Equity. Preventive Medicine (In Press).  
53  
54  
55 (29) Lagarde M. How to do (or not to do)...assessing the impact of a policy change with routine  
56 longitudinal data. Health Policy Plan 2012;27(1):76-83.  
57  
58  
59  
60

1  
2  
3 (30) Statistics Canada. Use of administrative data. 2014; Available at: <http://www.statcan.gc.ca/pub/12-539-x/2009001/administrative-administratives-eng.htm>. Accessed 12/12, 2014.  
4  
5  
6  
7  
8  
9  
10  
11  
12  
13  
14  
15  
16  
17  
18  
19  
20  
21  
22  
23  
24  
25  
26  
27  
28  
29  
30  
31  
32  
33  
34  
35  
36  
37  
38  
39  
40  
41  
42  
43  
44  
45  
46  
47  
48  
49  
50  
51  
52  
53  
54  
55  
56  
57  
58  
59  
60

Confidential

**Table 1:** Characteristics of new incoming callers receiving treatment during pre- and post-label periods for Ontario

| Characteristics*                             | Period; no.(%) of new callers |                               |                                | P value  |
|----------------------------------------------|-------------------------------|-------------------------------|--------------------------------|----------|
|                                              | Total<br>(n= 12,157)          | Pre-HWL<br>Policy<br>(n=4815) | Post-HWL<br>Policy<br>(n=7342) |          |
| Mean age, years (SD)                         | 45.6 (14.9)                   | 47.0 (14.1)                   | 44.6 (15.3)                    | p<0.0001 |
| Gender, male                                 | 5709 (47.0)                   | 1966 (40.8)                   | 3743 (51.0)                    | p<0.0001 |
| Education, high school or less               | 4160 (46.1)                   | 1384 (37.7)                   | 2766 (51.9)                    | p<0.0001 |
| Ethnicity, white                             | 6730 (81.7)                   | 2400 (85.7)                   | 4330 (79.6)                    | p<0.0001 |
| Smoking status at intake                     |                               |                               |                                | p<0.0001 |
| Daily                                        | 10115 (83.2)                  | 3692 (76.7)                   | 6423 (87.5)                    |          |
| Occasionally                                 | 133 (1.1)                     | 47 (1.0)                      | 86 (1.2)                       |          |
| Recent quitter                               | 1909 (15.7)                   | 1076 (22.4)                   | 833 (11.4)                     |          |
| For Smokers (Daily or Occasional):           | (n=10248)                     | (n=3739)                      | (n=6509)                       |          |
| Cigarette consumption per day                |                               |                               |                                | p=0.79   |
| 1-10                                         | 2904 (24.5)                   | 1151 (24.9)                   | 1753 (24.3)                    |          |
| 11-20                                        | 3967 (33.5)                   | 1546 (33.4)                   | 2421 (33.5)                    |          |
| 21-30                                        | 3420 (28.9)                   | 1335 (28.9)                   | 2085(28.9)                     |          |
| 31+                                          | 1563 (13.2)                   | 595 (12.9)                    | 968 (13.4)                     |          |
| Time to first cigarette in the morning score |                               |                               |                                | p=0.04   |
| 61+ minutes                                  | 1118 (11.8)                   | 391 (11.1)                    | 727 (12.3)                     |          |
| 31-60 minutes                                | 884 (9.4)                     | 327 (9.3)                     | 557 (9.4)                      |          |
| 6-30 minutes                                 | 2856 (30.2)                   | 1025 (29.2)                   | 1831 (30.9)                    |          |
| within 5 minutes                             | 4592 (48.6)                   | 1773 (50.4)                   | 2819 (47.5)                    |          |
| Heaviness of Smoking Index                   |                               |                               |                                | p=0.15   |
| Low                                          | 2518 (26.7)                   | 913 (26.0)                    | 1605 (27.1)                    |          |
| Medium                                       | 4028 (42.7)                   | 1544 (44.0)                   | 2484 (42.0)                    |          |
| High                                         | 2886 (30.6)                   | 1053 (30.0)                   | 1833 (31.0)                    |          |
| Intend to quit in 30 days                    | 9199 (90.4)                   | 3276 (88.6)                   | 5923 (91.3)                    | p<0.0001 |

\* Missing: Age=824; Gender=6; Education=3134; Ethnicity=3915; Smoking Status=0 (selection criteria); Cigarette consumption=303; Time to first cigarette=798; Heaviness of Smoking Index=816; Intent to quit=67



**Table 2:** Descriptive Changes in Overall Switchboard Call Volume and Number of New Callers Per Month Before and After the Introduction of the New Health Warning Labels, for Driven to Quit, and the January Effect.

|                                     | Overall Call Volume |                | New Callers |                |
|-------------------------------------|---------------------|----------------|-------------|----------------|
|                                     | Mean                | 95% CI of mean | Mean        | 95% CI of mean |
| <b>HWL Intervention<sup>1</sup></b> |                     |                |             |                |
| Before HWL policy                   | 1043                | 868-1218       | 185         | 146-224        |
| After HWL policy                    | 1591                | 1355-1827      | 334         | 288-380        |
| Percent Difference                  | 52.5%               |                | 80.5%       |                |
| <b>Driven-to-Quit</b>               |                     |                |             |                |
| Months without D2Q                  | 1246                | 1086-1407      | 246         | 209-283        |
| Months with D2Q                     | 2016                | 1783-2248      | 363         | 226-500        |
| Percent Difference                  | 61.8%               |                | 47.5%       |                |
| <b>January effect</b>               |                     |                |             |                |
| Not in January                      | 1287                | 1113-1461      | 247         | 209-286        |
| In January                          | 1376                | 1234-1518      | 318         | 252-384        |
| Percent Difference                  | 6.9%                |                | 28.7%       |                |

<sup>1</sup>Unadjusted for the effects of D2Q and the January effect.

**Table 3:** Health Warning Label Intervention Autoregressive Integrated Moving Average (ARIMA) Results for Overall Switchboard Call Volume and Number of New Callers

| Parameter                        | Overall Call Volume                                 |                  | New Callers   |                 |        |
|----------------------------------|-----------------------------------------------------|------------------|---------------|-----------------|--------|
|                                  | Estimate (SE)                                       | P value          | Estimate (SE) | P Value         |        |
| <b>Intervention<sup>1</sup></b>  |                                                     |                  |               |                 |        |
|                                  | Baseline <sup>2</sup>                               | 869.79 (55.40)   | <.0001        | 152.81 (20.68)  | <.0001 |
|                                  | HWL Intervention <sup>3</sup> (Mar 2012 - Dec 2013) | 1390.62(108.94)  | <.0001        | 267.02 (40.03)  | <.0001 |
|                                  | Sustainability <sup>4</sup> (Oct 2012 - Dec 2013)   | -1018.99(113.54) | <.0001        | -145.04 (40.64) | .001   |
| <b>Other Events</b>              |                                                     |                  |               |                 |        |
|                                  | Driven-to-quit                                      | 1087.37(130.43)  | <.0001        | 168.36 (32.88)  | <.0001 |
|                                  | January effect                                      | 433.17 (117.35)  | .001          | 135.80 (29.22)  | <.0001 |
| <b>Auto-Regressive Parameter</b> |                                                     |                  |               |                 |        |
|                                  |                                                     | 0.175 (0.169)    | .305          | 0.460 (0.163)   | .007   |
| <b>Model Diagnostics</b>         |                                                     |                  |               |                 |        |
|                                  | Stationary R-squared                                |                  | .87           |                 | .82    |
|                                  | RMSE                                                |                  | 212.25        |                 | 55.36  |

RMSE root mean square error

<sup>1</sup> Adjusting for the Driven-to-Quit and January effects

<sup>2</sup> Constant in model (the average monthly call volume and new callers adjusting for months with no intervention and no D2Q or January effects).

<sup>3</sup> Additional average monthly call volume and new callers over baseline for March 2012-December 2013, adjusting for D2Q and January effect.

<sup>4</sup> Average monthly reduction in call volume and new callers from peak months of March 2012-September 2012 adjusting for January effect.

1  
2  
3  
4  
5  
6  
7  
8 **Figure 1:** Example\* Cigarette Package Health Warning Label - March 2012 to Present

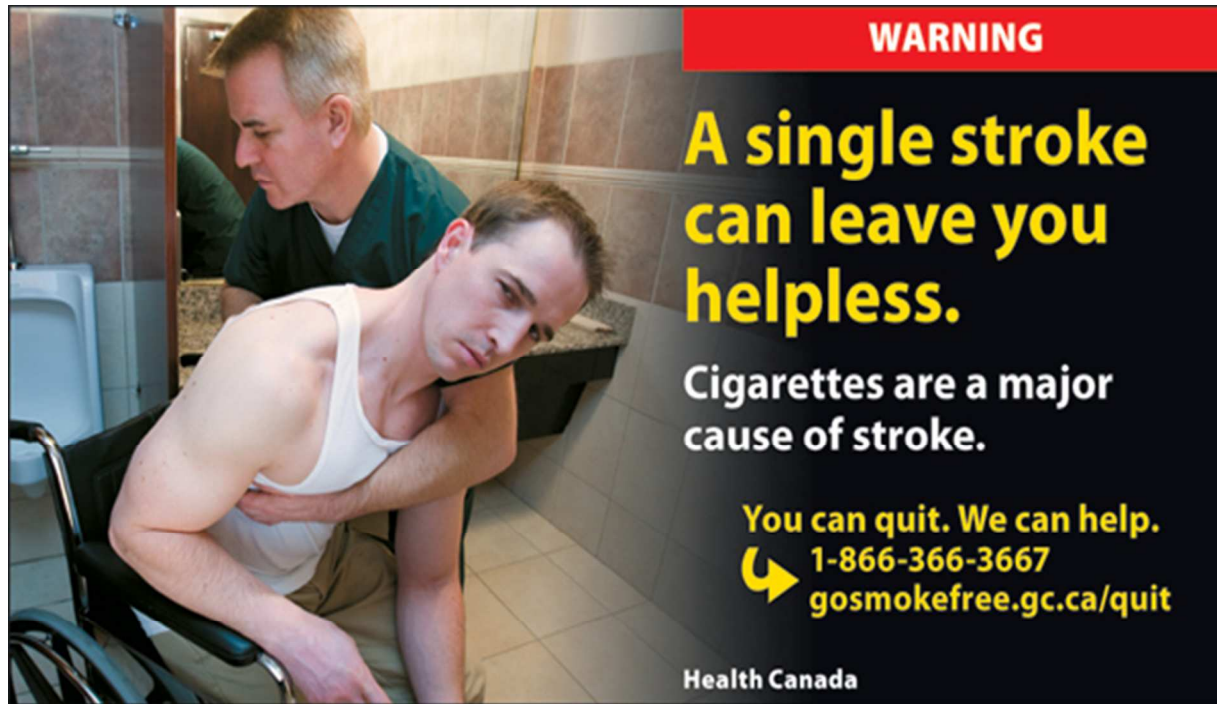

32  
33 \* additional examples can be found at <http://www.hc-sc.gc.ca/hc-ps/tobac-tabac/legislation/label-etiquette/cigarette-eng.php>

34  
35  
36  
37  
38  
39  
40  
41  
42  
43  
44  
45  
46  
47  
48  
49  
50  
51  
52  
53  
54  
55  
56  
57  
58  
59  
60

1  
2  
3  
4  
5  
6  
7  
8  
9  
10  
11  
12  
13  
14  
15  
16  
17  
18  
19  
20  
21  
22  
23  
24  
25  
26  
27  
28  
29  
30  
31  
32  
33  
34  
35  
36  
37  
38  
39  
40  
41  
42  
43  
44  
45  
46  
47  
48  
49  
50  
51  
52  
53  
54  
55  
56  
57  
58  
59  
60

**Figure 2: Ontario Monthly Overall Switchboard Call Volume and New Caller Volume Before and After the Introduction of the New Health Warning Labels**

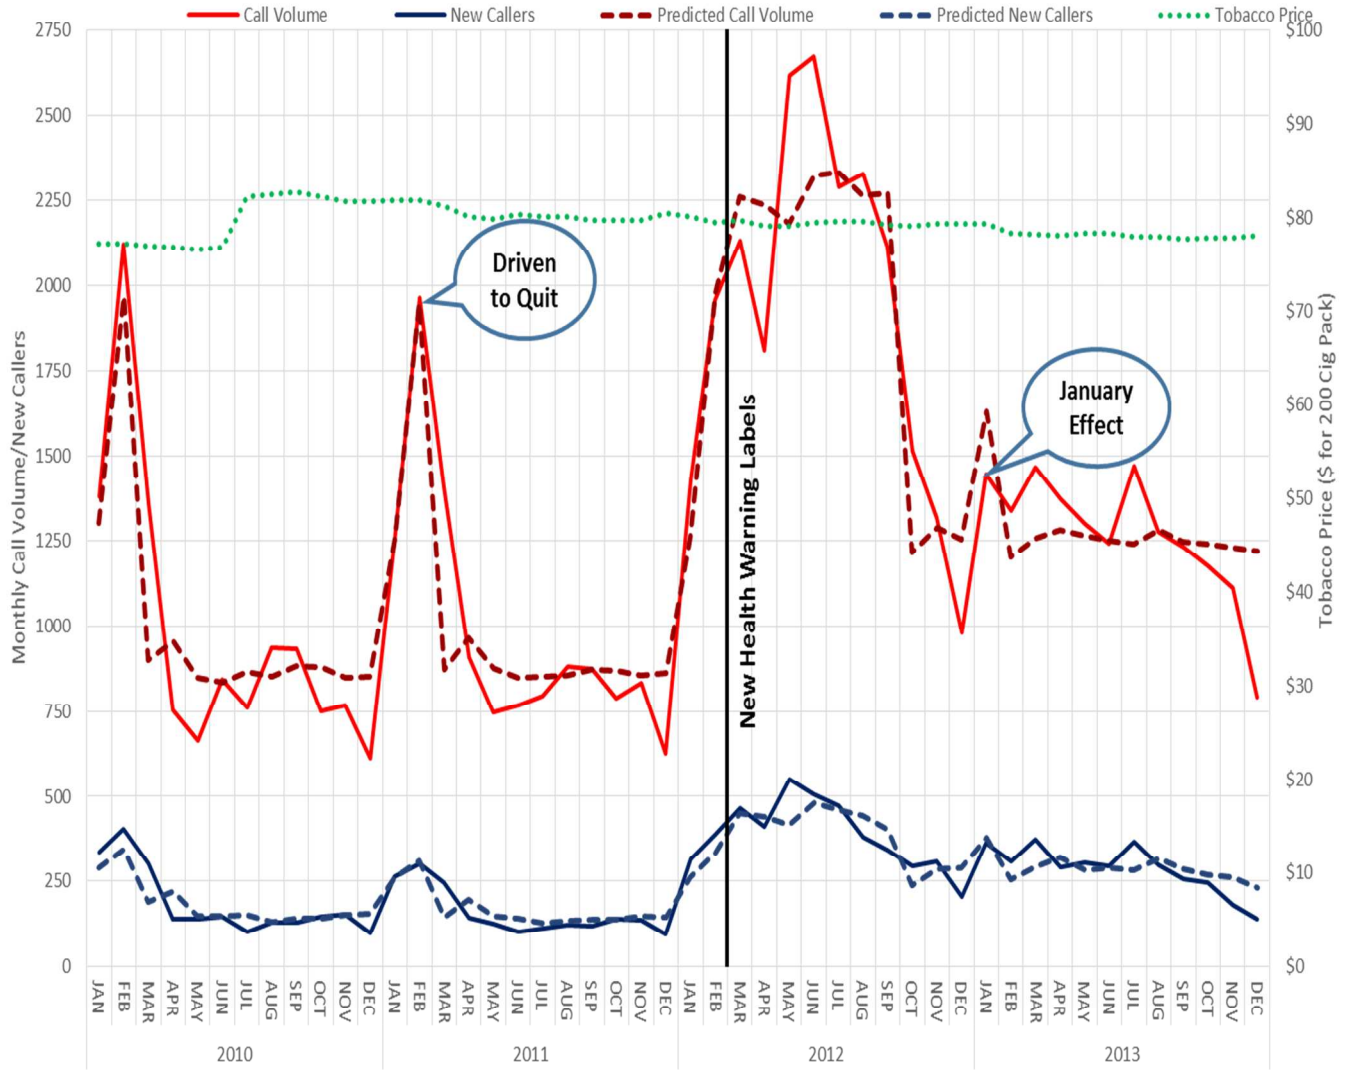

Supplement: open-2015-0104-original-submission.pdf [file open-2015-0104-original-submission.pdf]
